# Supplementary material for: The role of sequence in altering the unfolding pathway of an RNA pseudoknot: a steered molecular dynamics study
Source: Royal Society of Chemistry journal article supplement (doi:10.1039/c6cp04617g), 2016-01-01
Supplement: c6cp04617g3.pdf [file c6cp04617g3.pdf]

## Supplementary information for “The Role of Sequence in Altering the Unfolding Pathway of an RNA Pseudoknot: A Steered Molecular Dynamics Study”

Asmita Gupta and Manju Bansal

Supplementary figure S1: Contacts between C23 (MUT2) and C6+ residue. Native structure residues were superposed on mut2 along with the structurally similar region in Sugarcane leaf yellow virus (ScYLV) containing C27 residue.

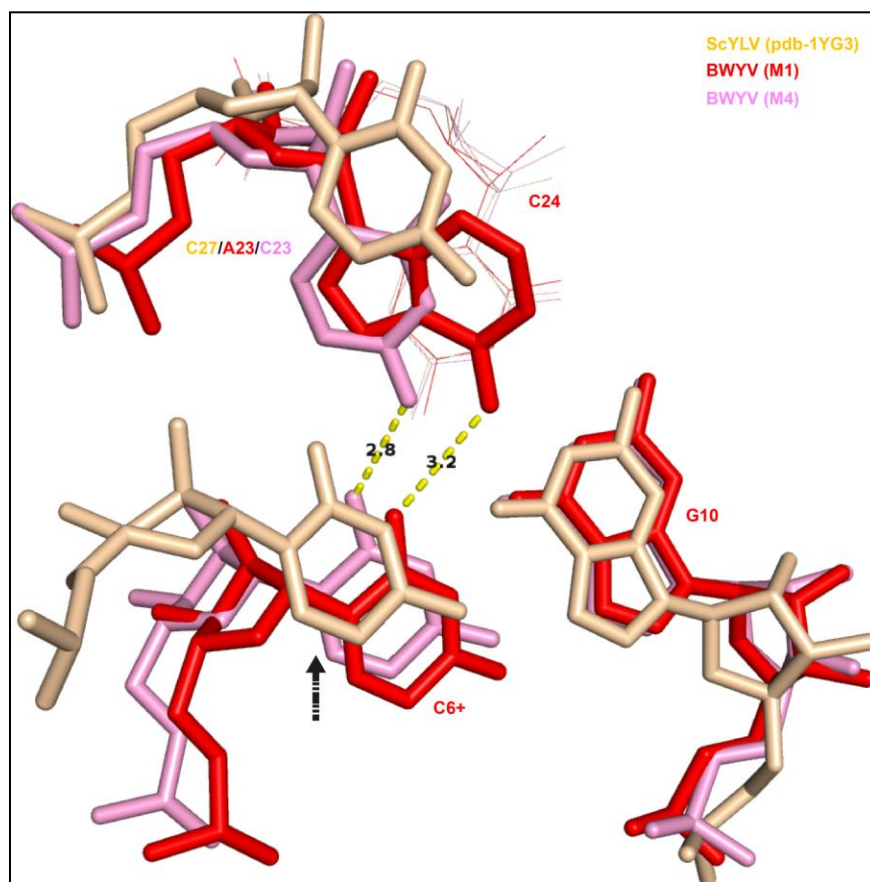

Supplementary figure S2: Snapshots extracted from mut1 simulation (C2G15) at 42 and 63Å extensions and the corresponding secondary structure representations for these intermediate structures

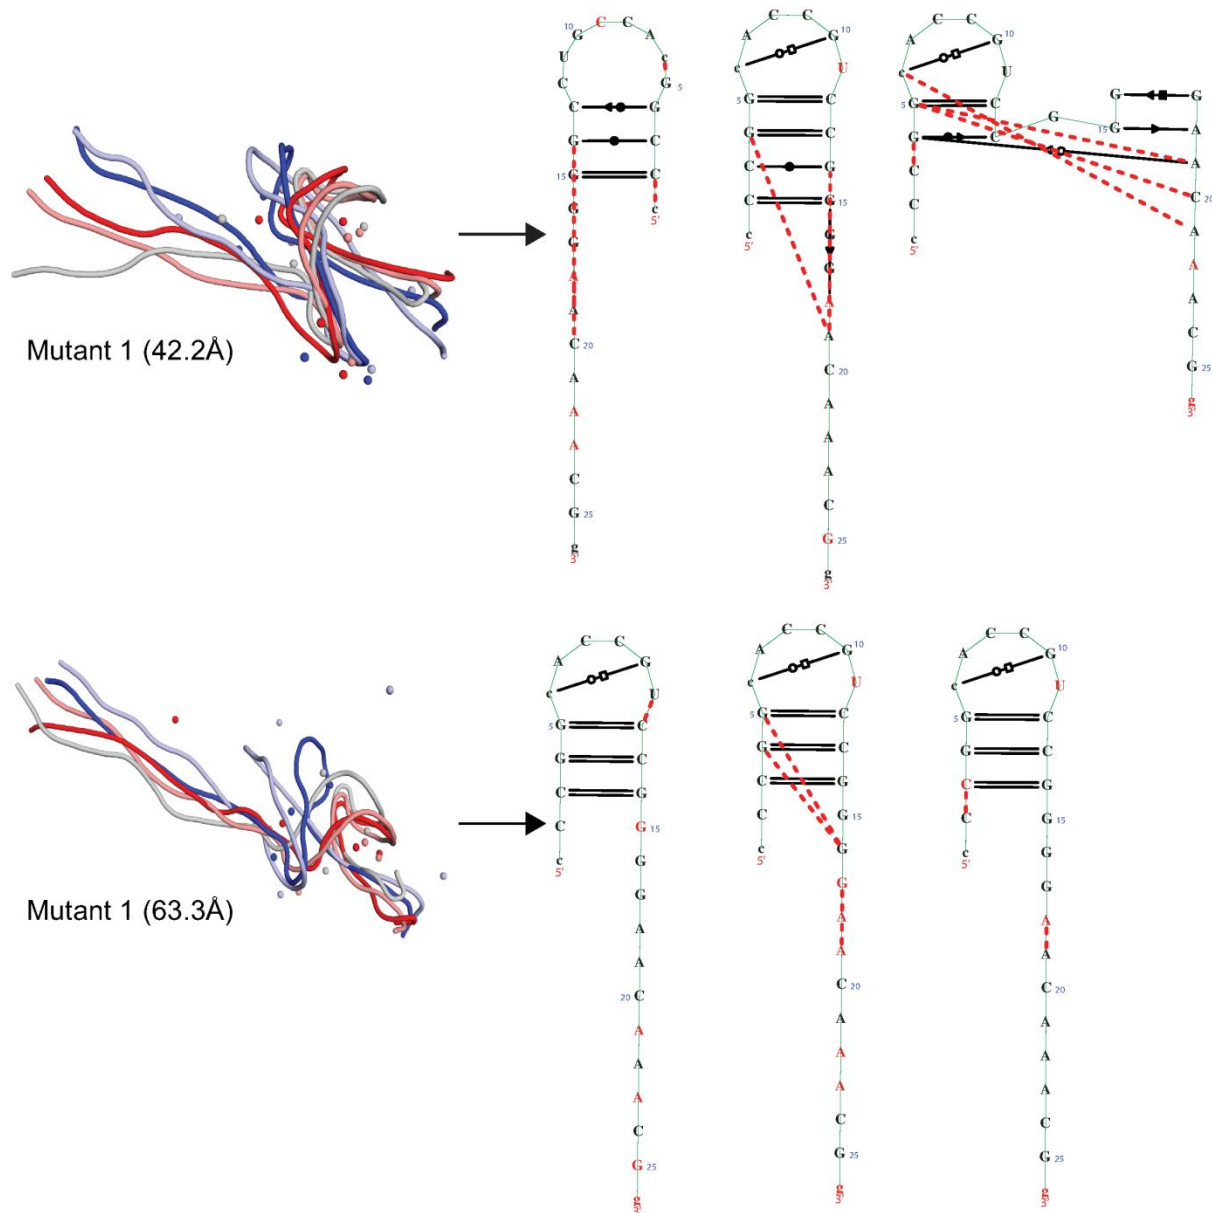

### Secondary structure schematics from different pulling runs

Supplementary figure S3: Snapshots extracted from mut3 simulation (G9C25) at 42 and 63Å extensions and their corresponding secondary structure representations.

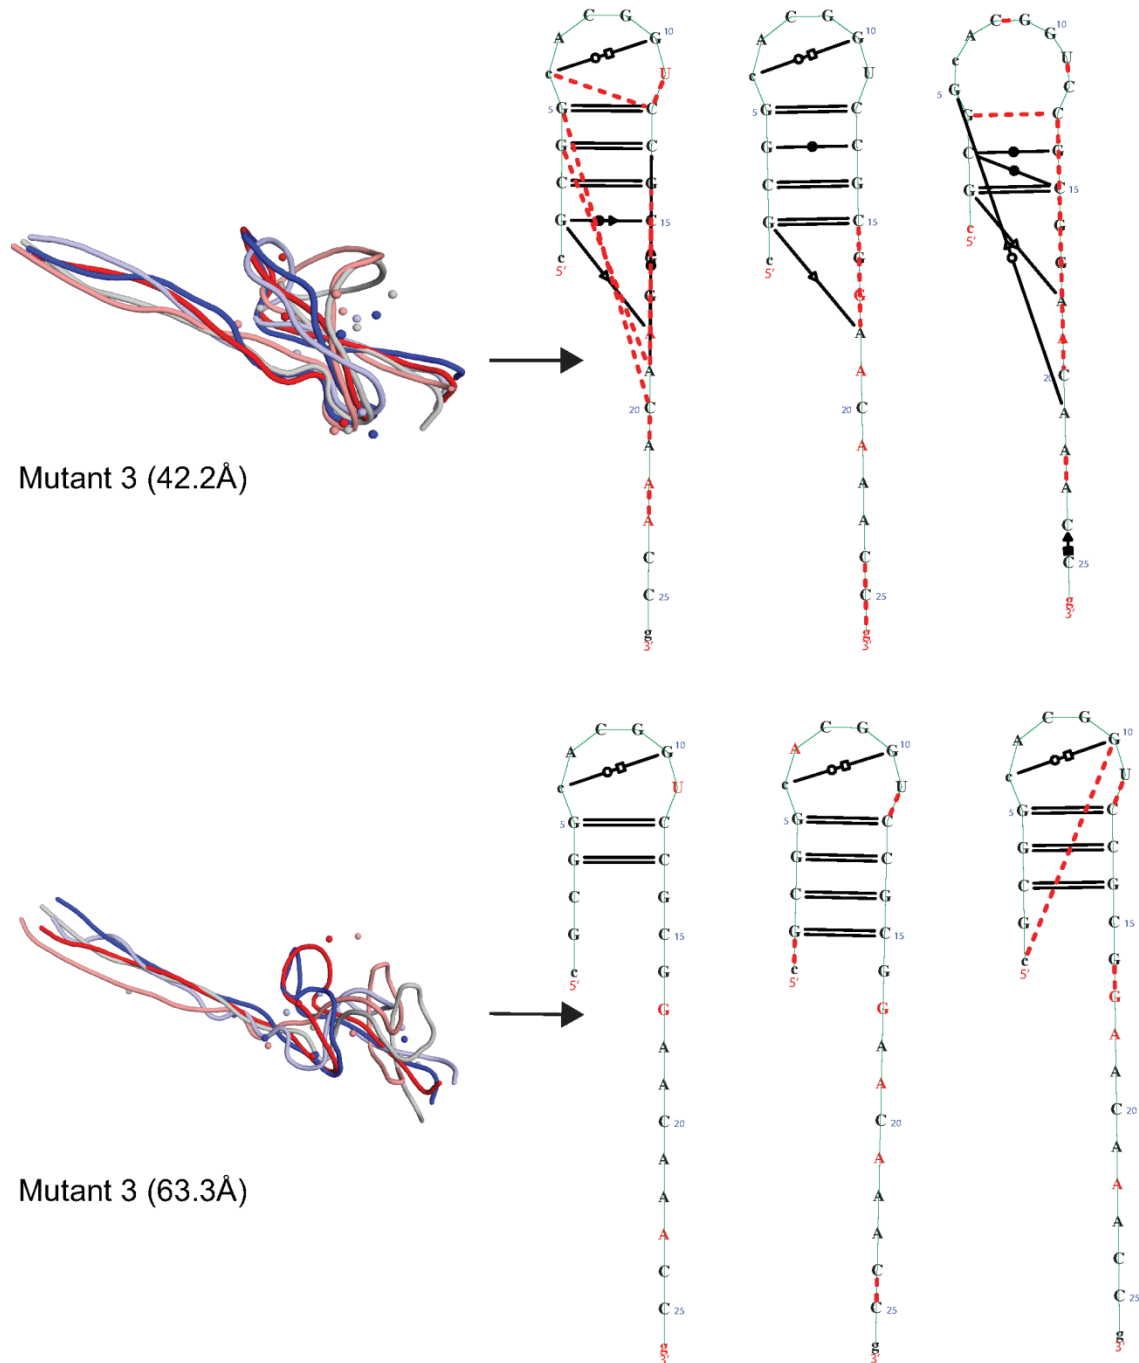

Supplementary figure S4: Disruption of strand dependent non-canonical contacts (a) tertiary structure of Beet Western Yellow Virus pseudoknot. Stem 1 is colored magenta, stem 2 is yellow, loop 1 is orange and loop 2 is cyan (b, c) hydrogen bonds formed between loop 2 residues A18, A22 and G2, G5 respectively (d, e) hydrogen bonds formed between loop 2 residues A19, A21, A23 and stem 1 residues G14, C13, C12 (f) hydrogen bonds between base quadruple formed by C6-G10-C24-A23 at the pseudoknot junction region

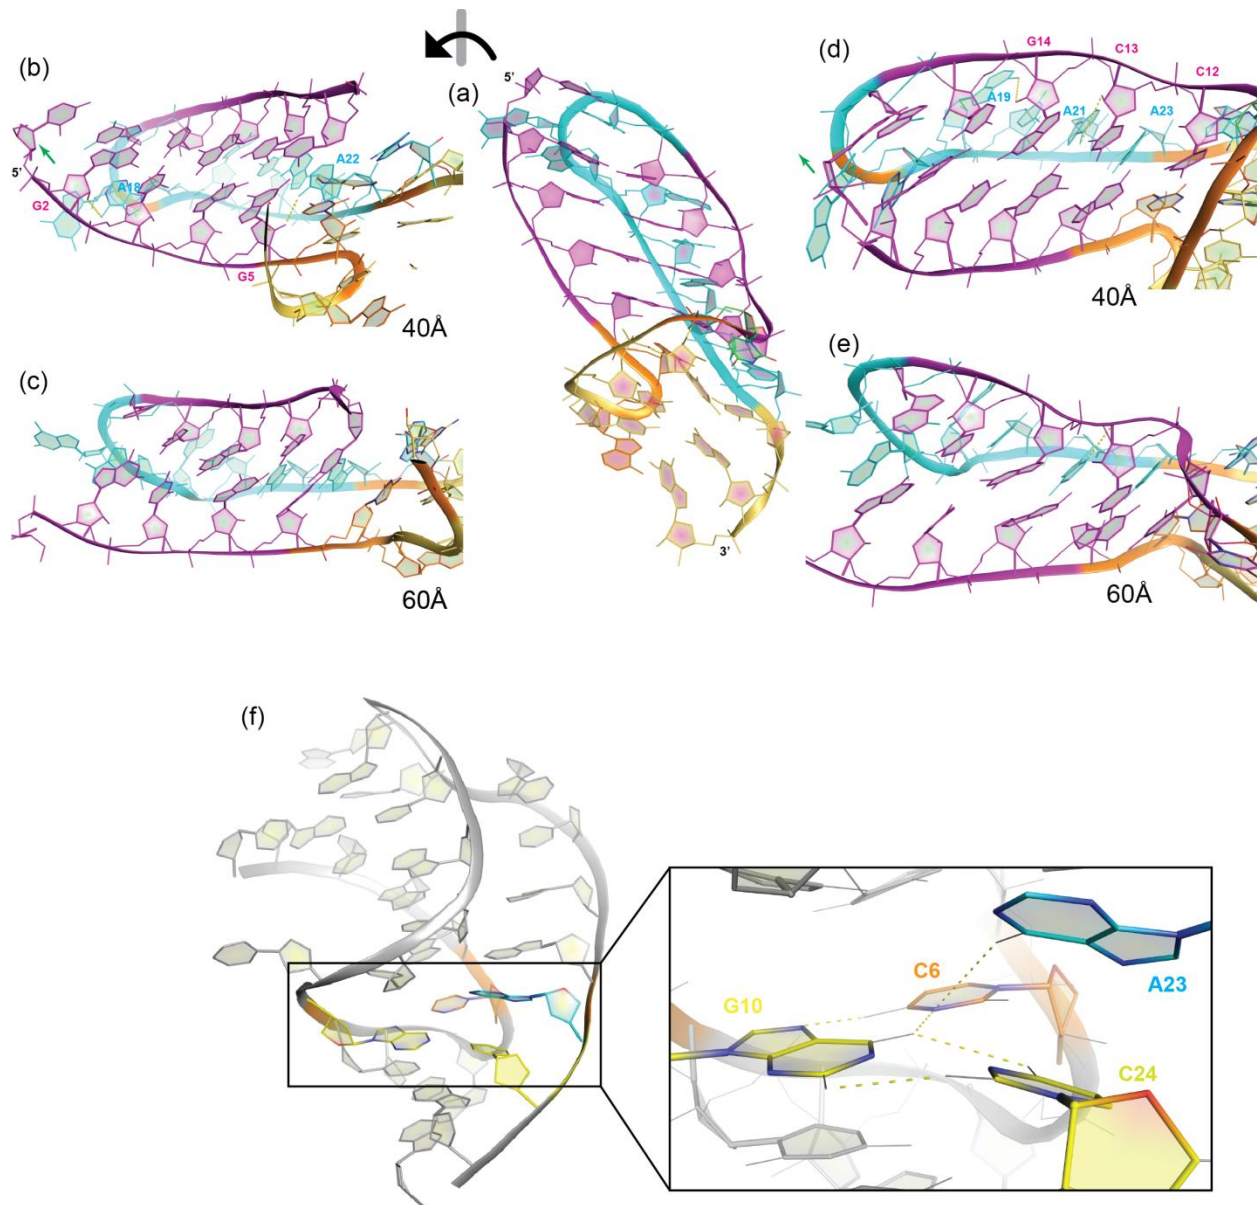

Supplementary figure S5: Correlation values corresponding to the matrix in figure S6

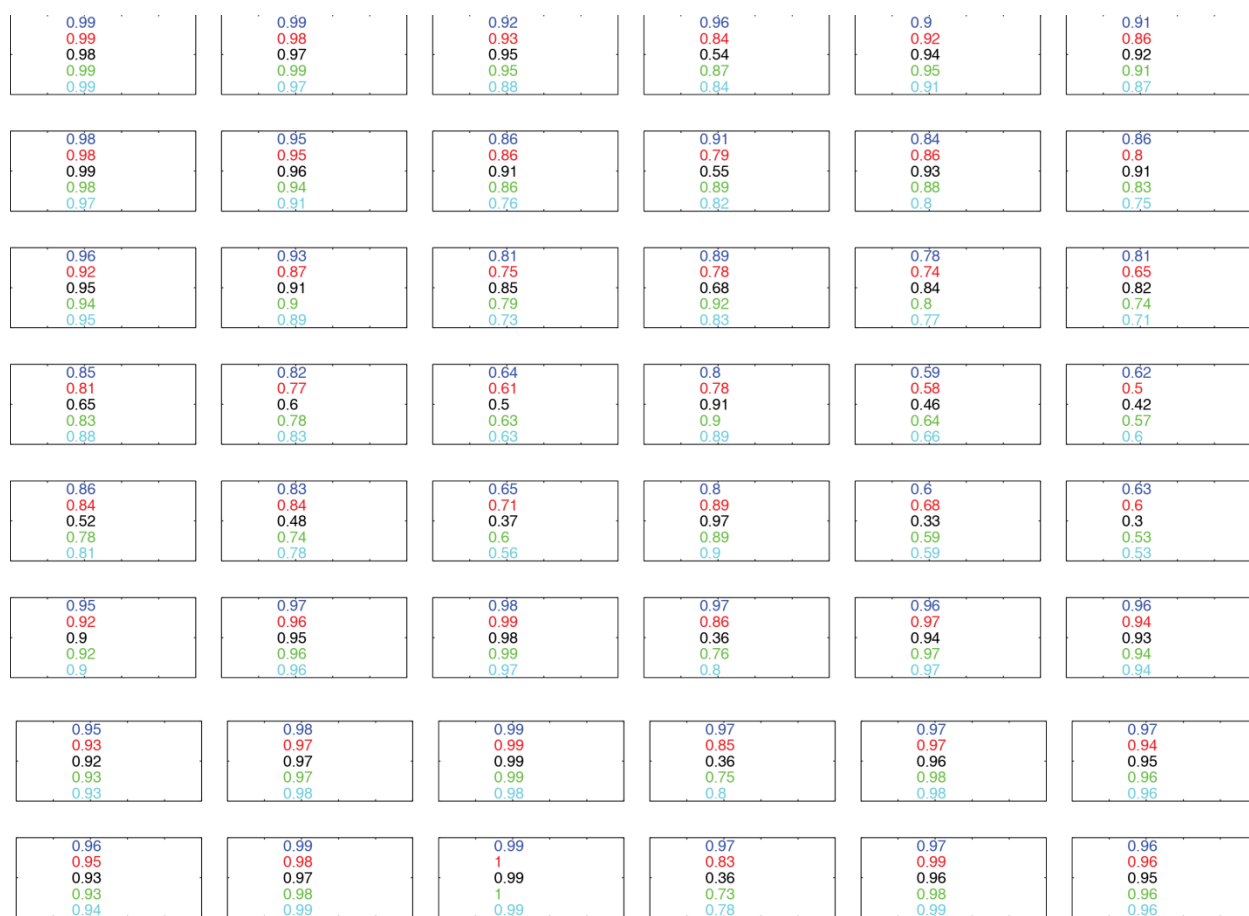

Supplementary figure S6: Correlation matrix showing base pair opening of all the WC pairs of the structure in all the simulated structures. The diagonal shows the histogram distribution of the base-pair distance. Top right triangle indicates the Spearman's correlation coefficient values. X- and Y- axes indicates the values of the distance between the corresponding base-pair.

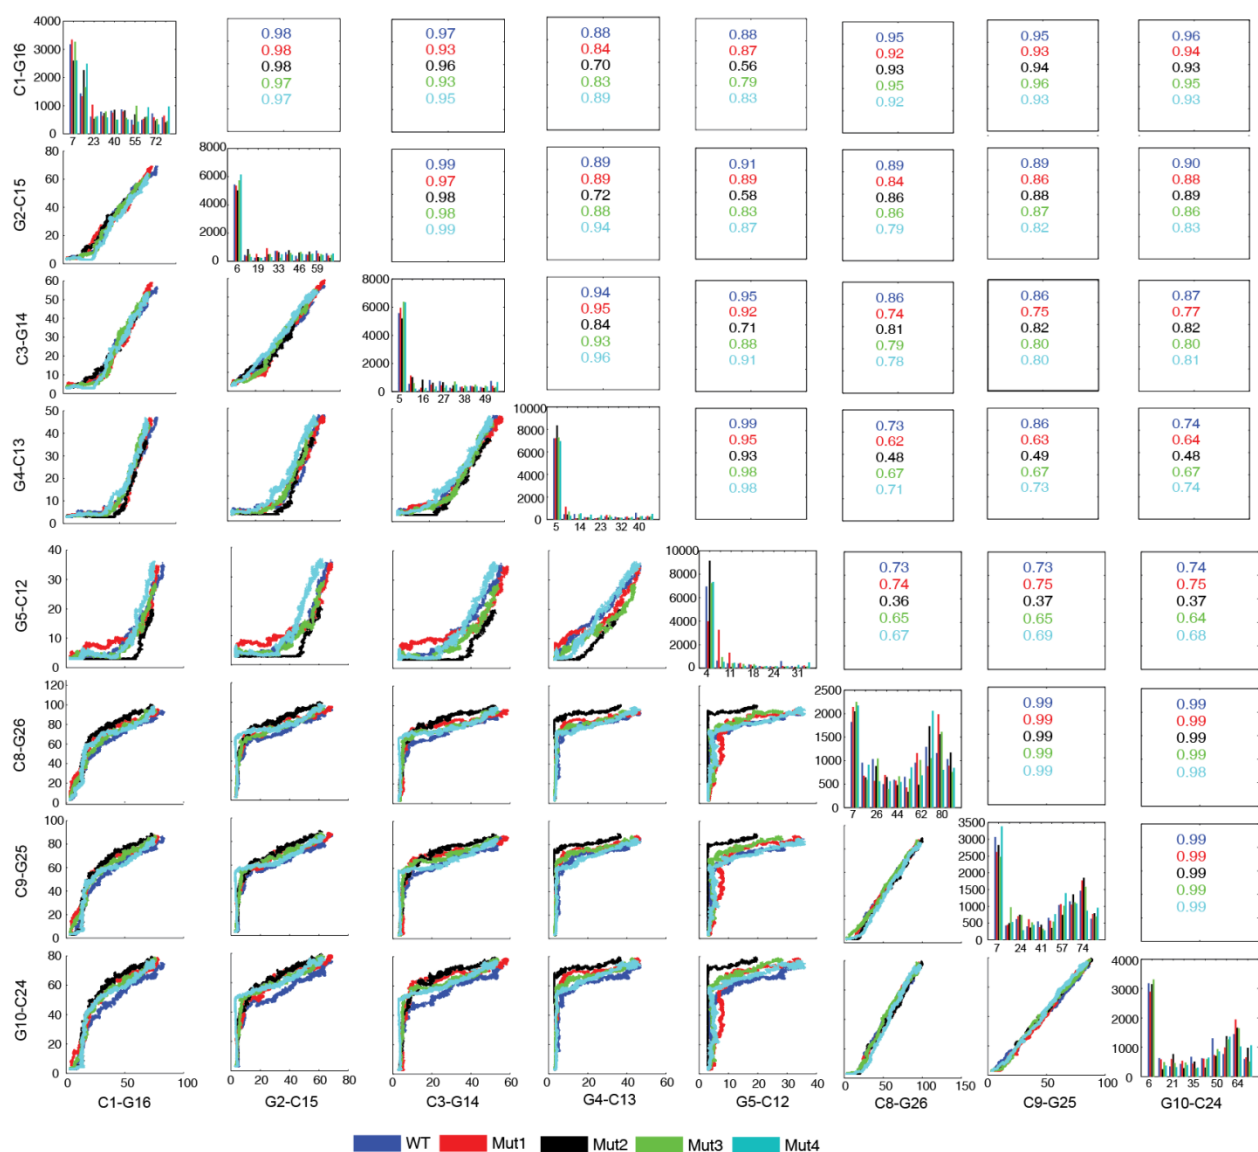

Supplementary figure S7: Hydration and ionic densities around Mut2 structures at different stages of extension.

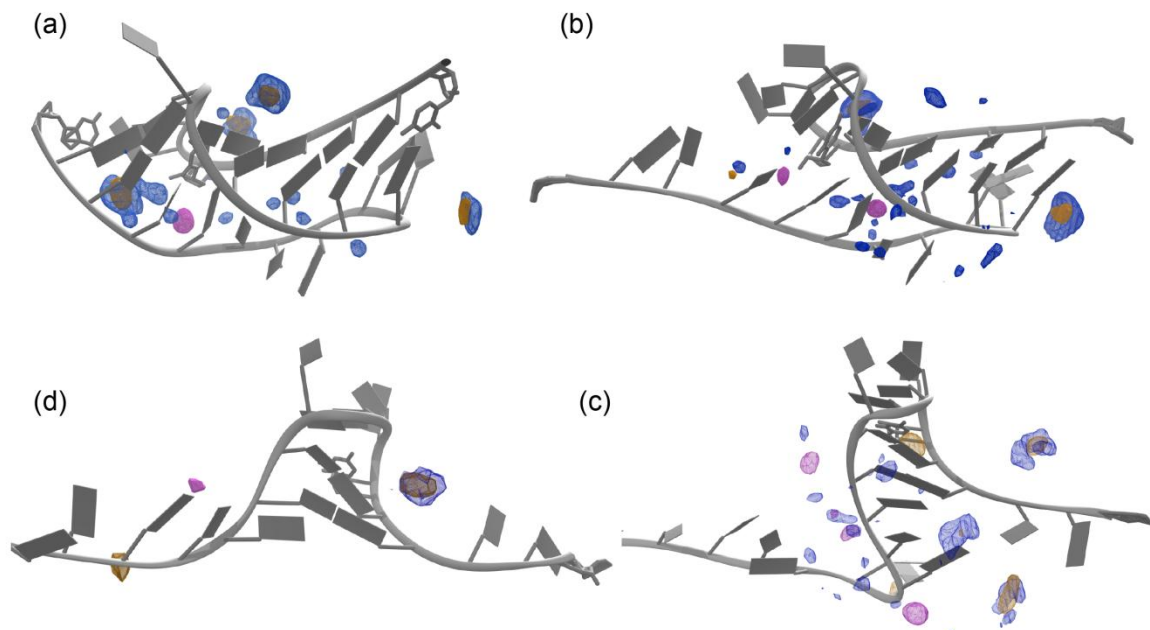



Figure S8: PMF profiles for different systems calculated using Jarzynski equality (blue) along with mean work done and its standard deviation (green) and Fluctuation – dissipation estimation (red)

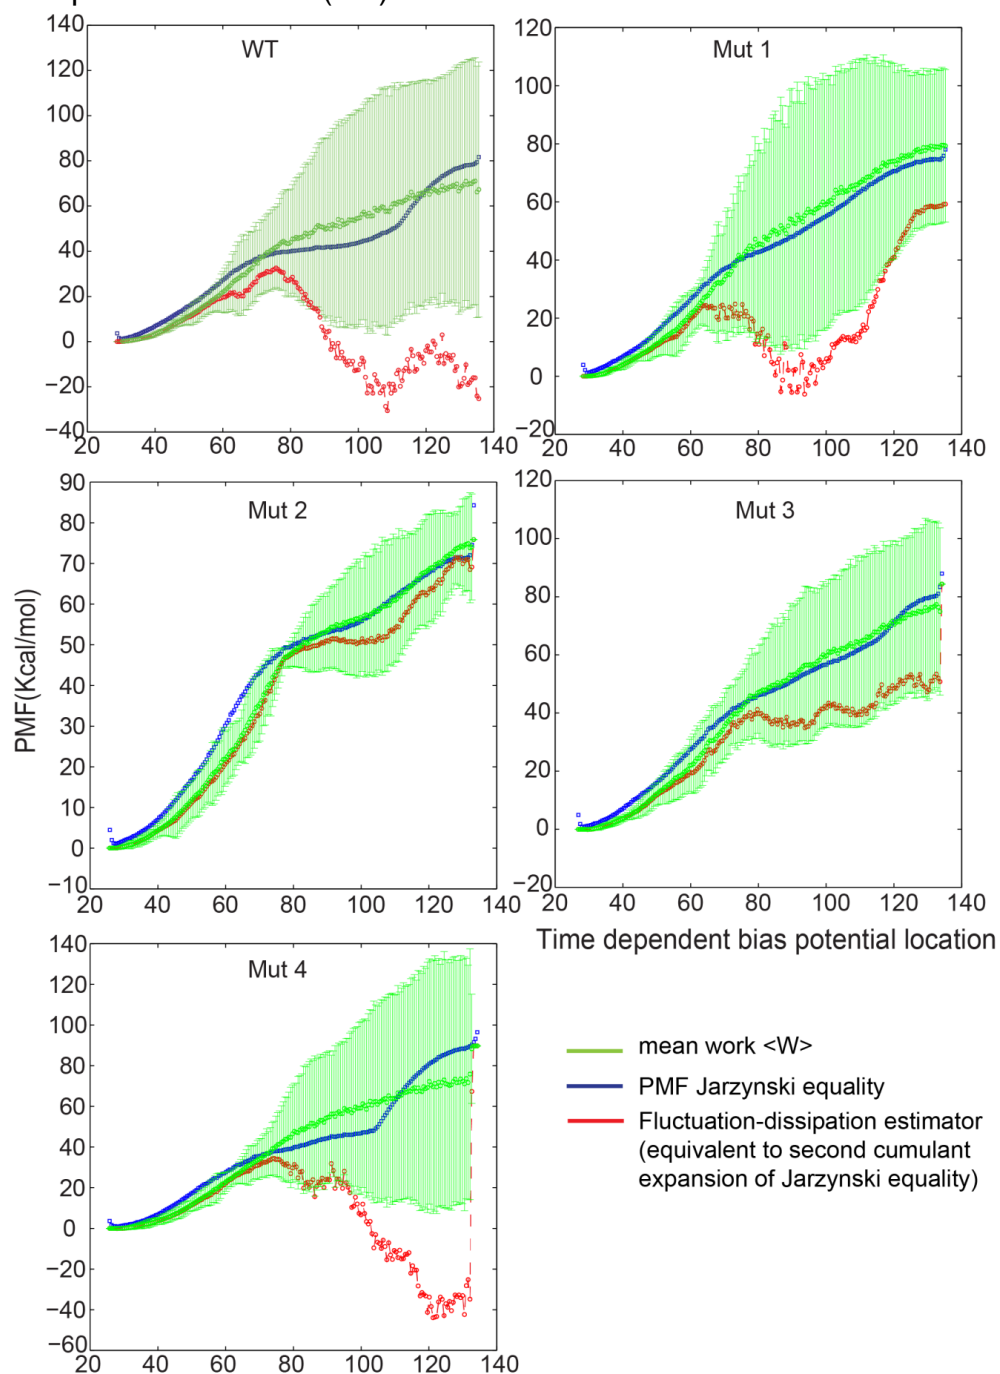

Supplementary table S1: Average hydrogen bond lengths between non canonical pairs in different systems from conventional MD simulations (cMD)



| pair <sup>#</sup>              | WT                |     | Mut1         |     | Mut2         |     | Mut3         |     | Mut4         |     | X-Ray |
|--------------------------------|-------------------|-----|--------------|-----|--------------|-----|--------------|-----|--------------|-----|-------|
|                                | mean <sup>†</sup> | %   | mean         | %   | mean         | %   | mean         | %   | mean         | %   |       |
| G2(N2)_A18(N3) <sup>a</sup>    | 2.9<br>(0.1)      | 100 | -            | -   | 3.0<br>(0.1) | 100 | 3.0<br>(0.1) | 100 | 3.0<br>(0.1) | 100 | 3.0   |
| G2(O2')_A18(N1) <sup>a</sup>   | 2.9<br>(0.2)      | 85  | 3.1<br>(0.3) | 68  | 2.9<br>(0.2) | 75  | 2.9<br>(0.2) | 83  | 2.9<br>(0.2) | 89  | 2.7   |
| C15(O2')_A18(O2') <sup>a</sup> | 3.4<br>(1.1)      | 77  | 3.0<br>(0.6) | 83  | 2.9<br>(0.6) | 93  | 3.1<br>(1.0) | 88  | 3.3<br>(0.6) | 53  | 2.7   |
| G4(N2)_A21(N1)                 | -                 | -   | -            | -   | -            | -   | -            | -   | -            | -   | 5.5   |
| C13(O2')_A21(N1)               | 2.9<br>(0.3)      | 84  | 2.8<br>(0.2) | 87  | 3.3<br>(0.8) | 60  | 2.9<br>(0.3) | 85  | -            | -   | 2.7   |
| C13(O2)_A21(N6)                | 3.2<br>(0.4)      | 87  | 3.2<br>(0.3) | 87  | 3.9<br>(1.0) | 64  | 3.2<br>(0.4) | 86  | -            | -   | 3.1   |
| G5(N2)_A22(N1) <sup>b</sup>    | 3.1<br>(0.2)      | 100 | 3.1<br>(0.2) | 100 | 3.0<br>(0.1) | 100 | 3.2<br>(0.4) | 95  | -            | -   | 3.0   |
| G5(N2)_A22(N6) <sup>b</sup>    | 3.5<br>(0.2)      | 36  | 3.6<br>(0.2) | 54  | 3.6<br>(0.2) | 57  | 3.6<br>(0.2) | 47  | -            | -   | 3.7   |
| G5(N3)_A22(N6) <sup>b</sup>    | 2.9<br>(0.1)      | 94  | 2.9<br>(0.1) | 95  | 2.9<br>(0.1) | 96  | 3.0<br>(0.2) | 90  | -            | -   | 2.9   |
| G5(O2')_A22(N6) <sup>b</sup>   | 3.0<br>(0.2)      | 81  | 3.0<br>(0.2) | 78  | 3.0<br>(0.2) | 72  | 3.1<br>(0.5) | 77  | -            | -   | 3.0   |
| C12(O2')_A23(N1) <sup>c§</sup> | 2.9<br>(0.5)      | 92  | 2.9<br>(0.3) | 89  | 2.9<br>(0.2) | 80  | 2.8<br>(0.1) | 97  | 3.4<br>(0.9) | 70  | 2.7   |
| C12(O2)_A23(N6) <sup>c§</sup>  | 3.1<br>(0.4)      | 88  | 3.0<br>(0.2) | 88  | 3.0<br>(0.3) | 66  | 3.0<br>(0.2) | 92  | 3.5<br>(1.0) | 64  | 2.8   |
| C6(N3)_G10(O6)                 | 2.8<br>(0.1)      | 98  | 2.8<br>(0.1) | 99  | 2.8<br>(0.1) | 96  | 2.8<br>(0.1) | 98  | 2.9<br>(0.1) | 97  | 2.7   |
| C6(N4)_G10(N7)                 | 2.9<br>(0.1)      | 95  | 2.9<br>(0.1) | 96  | 2.9<br>(0.1) | 94  | 2.9<br>(0.1) | 92  | 2.9<br>(0.1) | 98  | 3.0   |
| C6(O2)_A23(N6) <sup>d</sup>    | 3.3<br>(0.7)      | 87  | 3.4<br>(0.5) | 84  | 3.0<br>(0.2) | 99  | 3.7<br>(0.8) | 68  | -            | -   | 2.9   |
| G14(N2)_A19(OP2)               | 3.5<br>(0.9)      | 64  | -            | -   | 3.5<br>(0.9) | 58  | 3.2<br>(0.7) | 82  | -            | -   | 2.9   |
| G14(O2')_A19(N6)               | 3.3<br>(0.7)      | 74  | -            | -   | -            | -   | 3.3<br>(0.6) | 65  | -            | -   | 3.1   |
| A7(O2')_C8(OP1)                | -                 | -   | -            | -   | 2.9<br>(0.5) | 89  | 3.3<br>(0.9) | 62  | -            | -   | 4.8   |
| A7(OP1)_C8(N4)                 | -                 | -   | -            | -   | 3.2<br>(0.6) | 86  | 3.9<br>(1.2) | 54  | -            | -   | 2.9   |
| C3(O2)_A18(O2')                | 3.2<br>(0.5)      | 51  | 3.2<br>(0.4) | 53  | -            | -   | 3.2<br>(0.5) | 59  | -            | -   | 2.9   |
| G17(N2)_G17(OP2)               | -                 | -   | 3.9<br>(2.3) | 68  | -            | -   | -            | -   | -            | -   | 9.4   |
| G17(O2')_A18(OP1)              | -                 | -   | 2.7<br>(0.2) | 91  | 3.6<br>(1.0) | 46  | 3.2<br>(0.8) | 56  | -            | -   | 4.7   |
| A22(O2')_A23(O5') <sup>e</sup> | 3.1<br>(0.2)      | 74  | 3.1<br>(0.2) | 74  | 3.1<br>(0.2) | 65  | 3.1<br>(0.2) | 73  | -            | -   | 4.2   |
